# Supplementary material for: Identification and validation of a novel zinc finger protein-related gene-based prognostic model for breast cancer
Source: PeerJ journal article supplement (doi:10.7717/peerj.12276), 2021-10-18

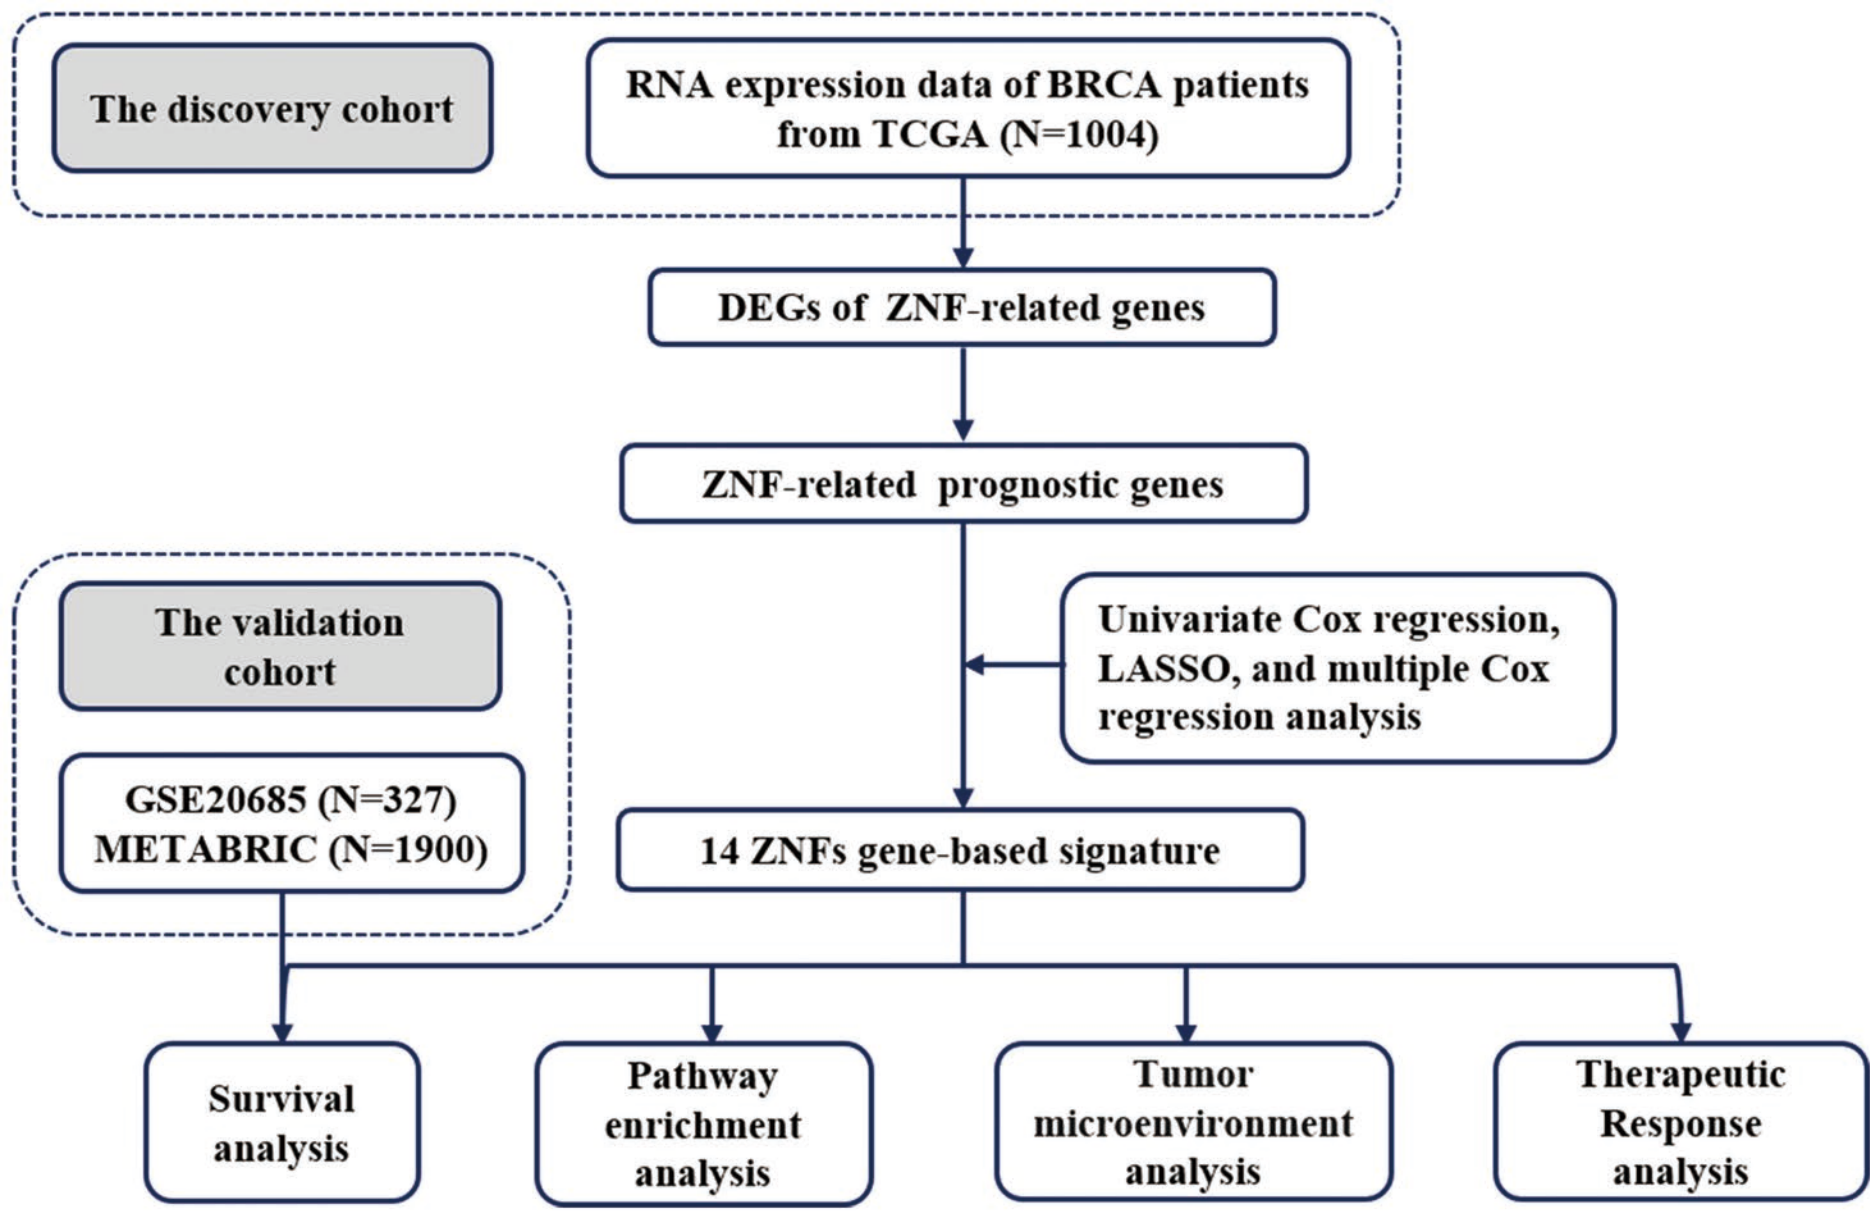

Supplement: FigureS1.pdf [file FigureS1.pdf]
