# Supplementary material for: Identification and validation of a novel zinc finger protein-related gene-based prognostic model for breast cancer
Source: PeerJ journal article supplement (doi:10.7717/peerj.12276), 2021-10-18

**A**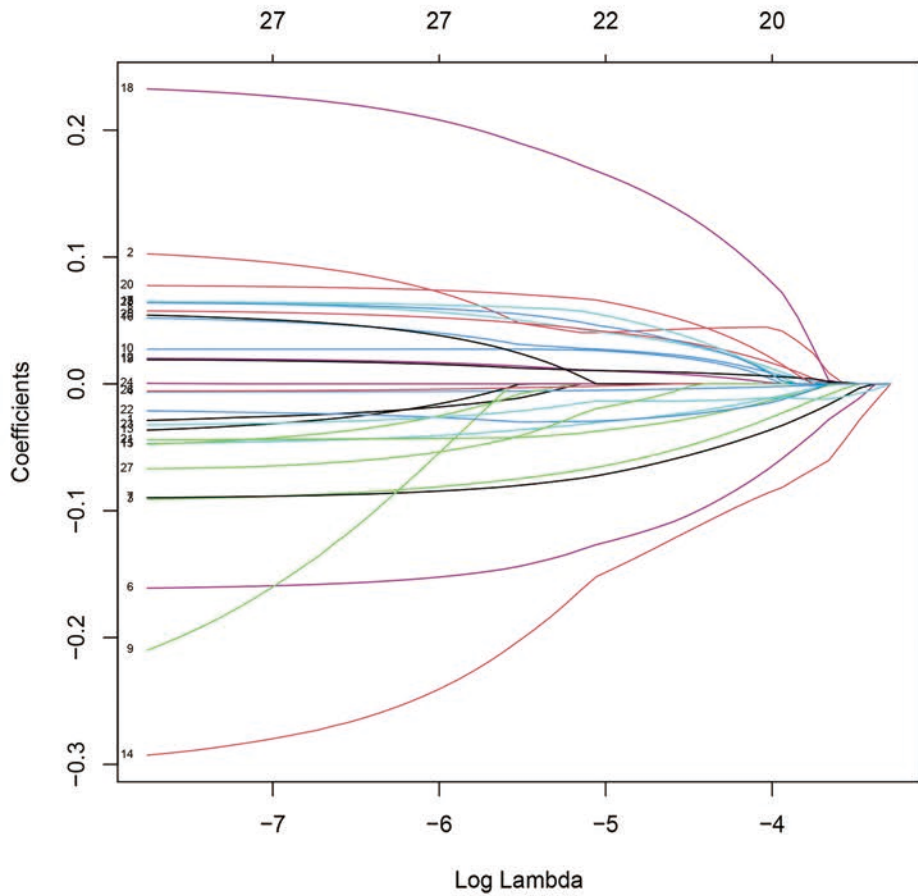**B**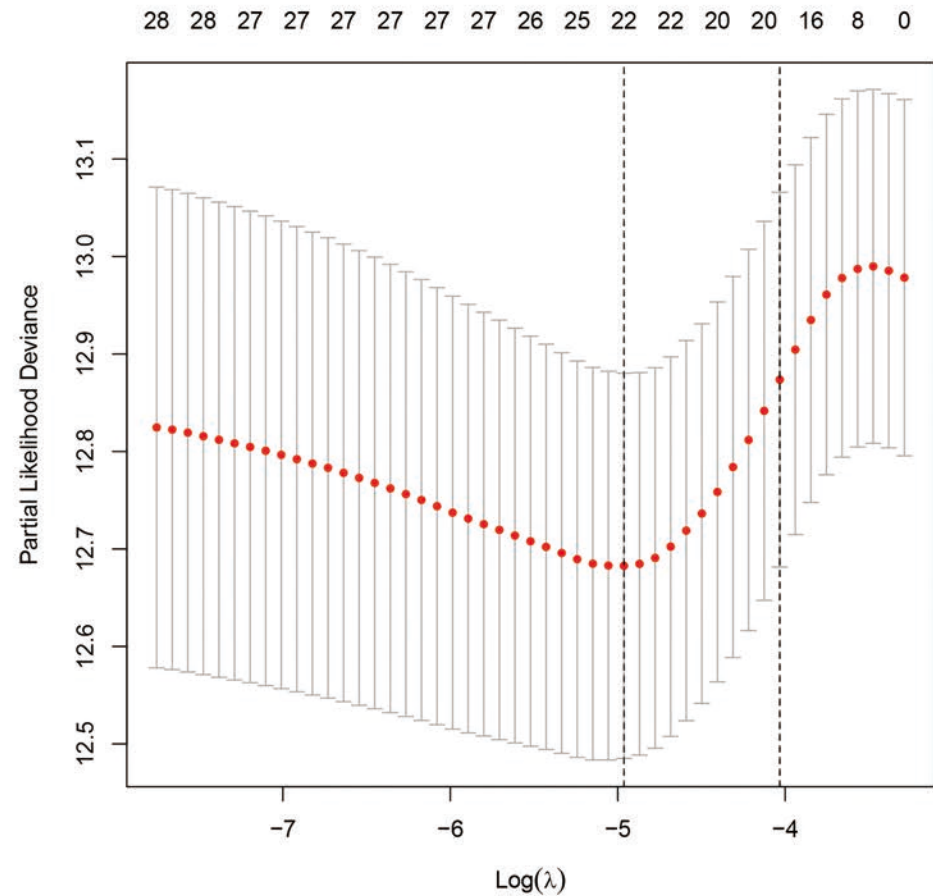

Supplement: FigureS2.pdf [file FigureS2.pdf]
